# Supplementary material for: Exploratory Study of Guanidine Derivatives as Novel Anti <i>Trypanosoma cruzi</i> Scaffolds
Source: Preprints.org preprint supplement (doi:10.20944/preprints202407.1775.v1), 2024-07-23
Supplement: Supplementary file 1 [file supplementary]

Supplementary material

Journal: **Pharmaceuticals**

Special Issue “**Drug Discovery of Antiprotozoal Agents 2024**”

**Exploratory Study of Guanidine Derivatives as Novel Anti *Trypanosoma cruzi* Scaffolds**

Eduardo Henrique Zampieri 1, Policarpo Ademar Sales Junior 2, Silvane Maria Fonseca Murta 2,*, Predrag Kalaba 3, Alexandre Prado-Roller 4, Natalie Gajic 4, Martin Zehl 5, Anna Fabisikova 5, Luana Ribeiro dos Anjos 1, Luana Passiano-to Gushiken 1, Gert Lubec 6, and Eduardo R. Perez Gonzalez 1,*

1. Fine Organic Chemistry Lab. Department of Chemistry and Biochemistry. Faculty of Science and Tech-nology. University of Sao Paulo State (Unesp). Roberto Simonsen, 305 – 19060080. Presidente Prudente, SP – Brazil. E-mails: eduardo.gonzalez@unesp.br; eduardo.h.zampieri@unesp.br; luana.anjos@unesp.br; [luana.lqof@gmail.com](mailto:luana.lqof@gmail.com)
2. Grupo Genômica Funcional de Parasitos, Instituto René Rachou, Fundação Oswaldo Cruz -Fiocruz Minas Avenida Augusto de Lima, 1715 – 30190-002, Belo Horizonte, MG, Brazil. E-mails: policar-po.junior@fiocruz.br; [silvane.murta@fiocruz.br](mailto:silvane.murta@fiocruz.br)
3. Department of Pharmaceutical Chemistry, Faculty of Life Sciences, University of Vienna UZ2, Al-thanstrasse 14,1090 Vienna, Austria. E-mails: [predrag.kalaba@univie.ac.at](mailto:predrag.kalaba@univie.ac.at)
4. Centre for X-ray Structure Analysis, Faculty of Chemistry, University of Vienna, Währinger Straße 40-42, 1090 Vienna, Austria. E-mails: [natalie.gajic@univie.ac.at](mailto:natalie.gajic@univie.ac.at) (N.G.); [alexander.roller@univie.ac.at](mailto:alexander.roller@univie.ac.at) (A.P.-R.)
5. Department of Analytical Chemistry and Mass Spectrometry Centre, Faculty of Chemistry, University of Vienna, Währinger Straße 38, A-1090 Vienna, Austria. E-mails: [anna.fabisikova@univie.ac.at](mailto:anna.fabisikova@univie.ac.at) (A.F.); [martin.zehl@univie.ac.at](mailto:martin.zehl@univie.ac.at) (M.Z.)
6. Department of Neuroproteomics, Paracelsus Medical University, 5020 Salzburg, Austria. E-mails: [gert.lubec@lubeclab.com](mailto:gert.lubec@lubeclab.com)

* Corresponding authors: [eduardo.gonzalez@unesp.br](mailto:eduardo.gonzalez@unesp.br) (E.R.P.G.); [silvane.murta@fiocruz.br](mailto:silvane.murta@fiocruz.br) (S.M.F.M.)

**Table of contents**

[1. Analysis for LQOF-G29 3](#_Toc171417592)

[1.1 NMR measurements 3](#_Toc171417593)

[1.2 EI-MS analysis 4](#_Toc171417594)

[1.3. LC/MS with UV/Vis detection analysis for LQOF-G29. 4](#_Toc171417595)

[2. Structural data of LQOF-G29 6](#_Toc171417596)

# Analysis of LQOF-G29

# NMR measurements


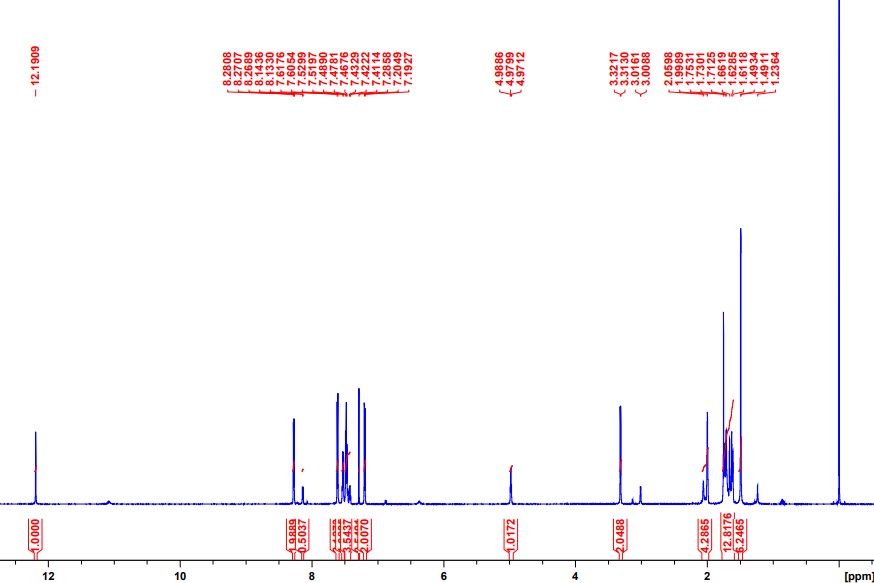

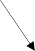

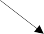

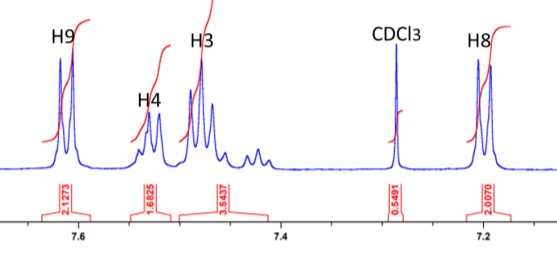

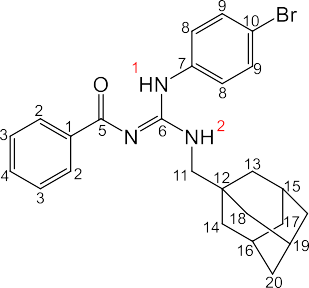


H13, H14, H18

21

H17, H20, H21

H15, H16, H19

NH1

H2

H11

NH2

**Figure S1.** 1H NMR spectrum of **LQOF-G29**.

21


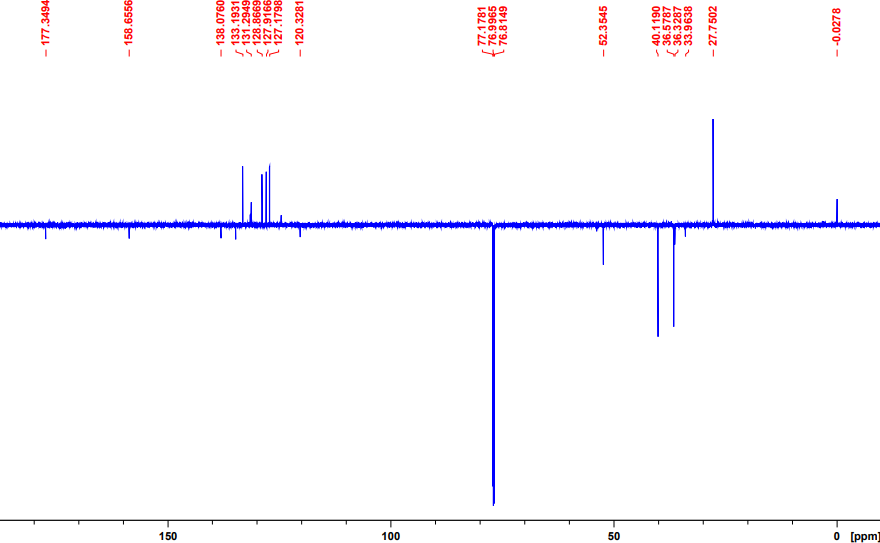

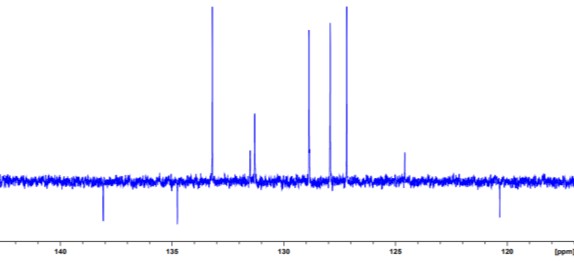

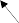

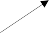

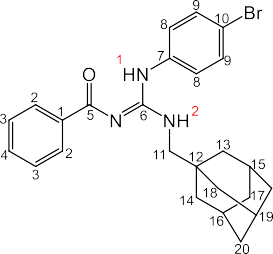


C15, C16, C19

C5

C6

C12

C9

C8

C2C3

C11

C17, C20,

C4 C13, C14, C21

C18

C1 C10

C7

**Figure S2.** 13C NMR spectrum of **LQOF-G29**.

#
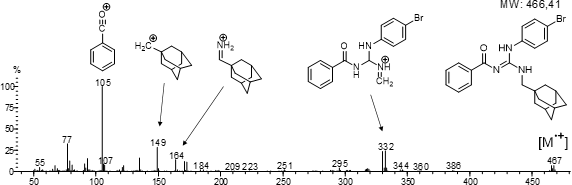
EI-MS analysis

**Figure. S3.** EI-MS (70 eV) spectrum of compound **LQOF-G29**.

# 1.3. HRESIMS and HPLC-UV analysis of LQOF-G29.


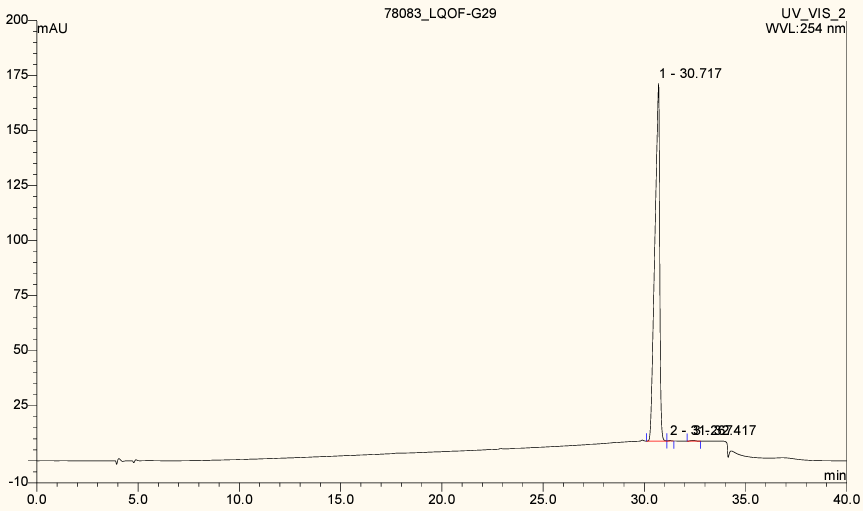

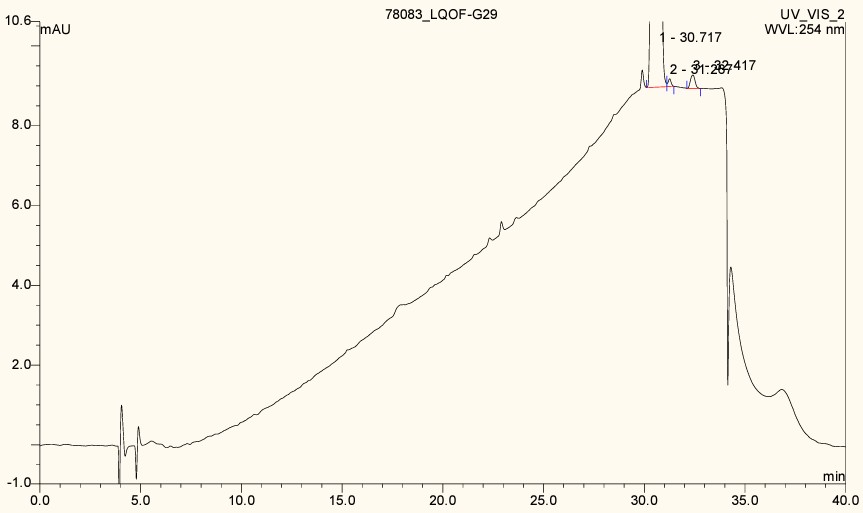


**Figure. S4.** HPLC-UV (254 nm) analysis of **LQOF-G29**.


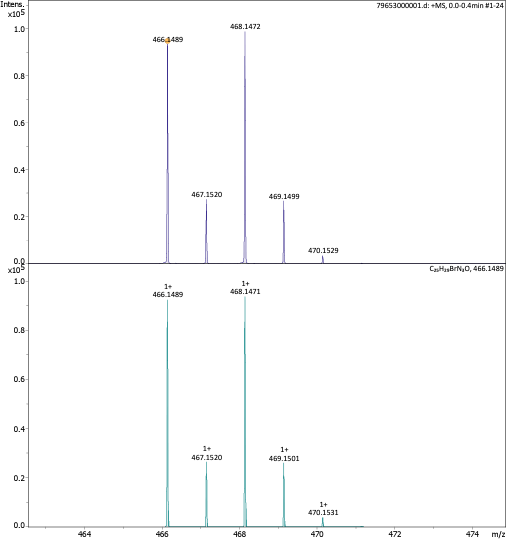


**Figure. S5.** HRESI-(+) MS analysis of **LQOF-G29**.


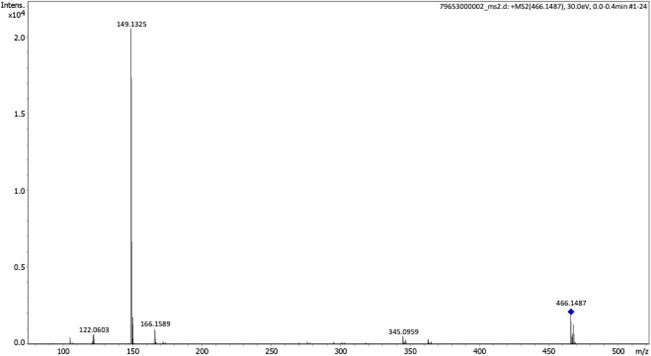


**Figure. S6.** HRESI-(+) MS/MS analysis of **LQOF-G29**.

# Structural data of LQOF-G29


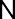

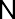

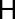

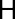

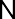

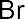


***N-((adamantanemethylamine))((4-bromophenyl)amino)methylene)benzamide*** (**LQOF-G29**). White solid. Yield 62%. Recrystallized with hexane. **LC-UV/MS**: 99.73%; **ESI(+)-MS** *m/z* found 466.1489, *m/z* calculated for [C25H27BrN3O + H]+: 466.1489; **ESI(+)-MS/MS**: [M + H – C7H5ONH2]+ *m/z* 345.0959, [M + H – C14H10BrN2O]+ *m/z* 166.1589, [M + H – C14H11BrN3O]+ *m/z* 149.1325. **1H NMR** (400.13 MHz, CDCl3) δ = 12.19 (s, 1H), 8.28 (d, *J* = 4.0 Hz, 2H), 7.61 (d, *J* = 4.8 Hz, 2H), 7.52 (t, *J* = 4.0 Hz, 1H), 7.47 (t, 4.2 Hz, 2H), 7.20 (d, 4.8 Hz, 2H), 4.97 (t, *J* = 3.5 Hz, 1H), 3.32 (d, *J* = 3.5 Hz, 2H), 1.99 (m, 3H), 1.75 (m, 6H), 1.49 (m, 6H); **13C NMR** (100.61 MHz, CDCl3) δ = 177.3 (C=O), 158.6 (C=N), 138.7 (C), 134.7 (C-Br), 133.1 (CH), 131.2 (CH), 128.8 (2CH), 127.9 (2CH), 127.1 (2CH), 120.3 (C), 52.3 (CH2), 40.1 (3CH2), 36.5 (3CH2), 33.9 (C), 27.7 (3CH).
